1 ***In vitro* activities of the tetrazole SHR8008 compared to itraconazole and**  
2 **fluconazole against *Candida* and *Cryptococcus* species**

3

4 Lili Wang<sup>a</sup>, Min Zhang<sup>a</sup>, Jian Guo<sup>a</sup>, Wenzheng Guo<sup>a</sup>, Ni Zhong<sup>a</sup>, Hui Shen<sup>a#</sup>, Wenjuan  
5 Wu<sup>a#</sup>

6

7 <sup>a</sup> Department of Laboratory Medicine, Shanghai East Hospital, Tongji University School  
8 of Medicine, Shanghai, China

9

10 **Running title:** A tetrazole against *Candida* and *Cryptococcus*

11

12 <sup>#</sup>Correspondence: Hui Shen, E-mail: 13761572798@163.com, Tel: +86-13761572798,

13 Address: 1800 Yuntai Road, Pudong New District, Shanghai, China

14 <sup>#</sup>Correspondence: Wenjuan Wu, E-mail: wwj1210@126.com, Tel: +86-021-20334503,

15 Address: 1800 Yuntai Road, Pudong New District, Shanghai, China

16

17

18 Lili Wang, Min Zhang, Jian Guo contributed equally to this work. Author order was  
19 determined by drawing straws.

20 **Abstract**

21 *Candida* and *Cryptococcus* are the main pathogens of clinical fungal infection associated  
22 with high morbidity and mortality. SHR8008 (in fact, this is the only official name in  
23 China and it is called VT-1161 by FDA) is a novel tetrazole agent that selectively inhibits  
24 fungal CYP51A compared to mammalian cytochrome P450 enzymes to achieve a better  
25 antifungal effect. The *in vitro* activities of SHR8008 and its comparators itraconazole and  
26 fluconazole were determined in 127 *Candida* and 50 *Cryptococcus* strains isolated from  
27 Chinese patients in the last 2 years by Invasive Fungal Infection Group. The MICs of  
28 SHR8008 and other triazoles were measured by the Clinical and Laboratory Standards  
29 Institute guidelines M27-E4. For *Candida* spp., SHR8008 (geometric mean MIC=0.078  
30 µg/mL) was 6.5-fold and 11.2-fold more potent than itraconazole and fluconazole,  
31 respectively. There is a good correlation of MICs between SHR8008 and  
32 itraconazole/fluconazole. The MIC values of SHR8008 against *Candida glabrata* and  
33 *Candida tropicalis* were significantly lower than those of fluconazole, while for *Candida*  
34 *albicans* and *Candida parapsilosis*, the differences between SHR8008 and fluconazole  
35 were not statistically significant, either. For *Cryptococcus* spp., SHR8008 (geometric  
36 mean MIC=0.024 µg/mL) was 21.7-fold and 104.5-fold more potent than itraconazole  
37 and fluconazole, respectively. Against the seven *Cryptococcus neoformans* isolates with  
38 elevated fluconazole MICs ( $\geq 8\mu\text{g/mL}$  based on the MIC<sub>90</sub> value for this azole), SHR8008  
39 maintained potent activity, with MICs ranging between 0.031 and 0.5 µg/mL. The results  
40 showed that tetrazole SHR8008 was more promising in the treatment of *Candida* and

41 *Cryptococcus* infection than itraconazole and fluconazole.

42 **Keywords:** SHR8008, itraconazole, fluconazole, *Candida*, *Cryptococcus*, MIC

## 43 **Introduction**

44 A growing number of immunocompromised patients have augmented morbidity of fungal  
45 infections, which range from easily treatable superficial type to life-threatening invasive  
46 infections(1, 2). The annual fungal infection incidences of common pathogens, including  
47 *Candida*, *Cryptococcus neoformans* and *Aspergillus*, have reached more than one in  
48 10,000, and the incidence of *Candida* infections has risen to fourth place in nosocomial  
49 infections(3-5). According to the China Hospital Invasive Fungal Surveillance Net  
50 (CHIF-NET) study, *Candida albicans* was the most common species (44.9%), followed  
51 by the *Candida parapsilosis* complex (20.0%), *Candida tropicalis* (17.2%), and the  
52 *Candida glabrata* complex (10.8%), with other species comprising 3% of *Candida*  
53 isolates(6).

54 There are several approved clinical antifungal agents that have had some success in  
55 reducing the high mortality of invasive fungal diseases such as candidiasis and  
56 cryptococcosis(7, 8). The guidelines recommend that the treatment for cryptococcosis  
57 includes the use of fluconazole as the primary treatment for mild to moderate pulmonary  
58 infection, or for consolidation and maintenance after induction therapy, including  
59 intravenous administration of amphotericin B and flucytosine for cryptococcal meningitis  
60 or complex pulmonary disease(9). However, current treatment of cryptococcosis remains  
61 limitations due to the reduced fluconazole susceptibility, the side effects of amphotericin  
62 B and the availability of treatment in resource-limited situations, such as the lack of  
63 access to 5-flucytosine and the high cost of liposome amphotericin B(10-12). With the

64 extensive use of azole antifungal drugs in clinical practice, the world's shift in favor of  
65 non-albicans *Candida* species is troubling. *Candida glabrata* and *Candida tropicalis*  
66 exhibited generally high rates of resistance to fluconazole. The emergence of  
67 multidrug-resistant *Candida albicans* and *Candida auris* poses a threat to global  
68 health(13-15).

69 The safer, more specific and more effective antifungal agents are needed. SHR8008 (in  
70 fact, this is the only official name in China and it is called VT-1161 by FDA), is a novel  
71 investigational tetrazole, which targets the biosynthesis of ergosterol by selectively  
72 inhibiting fungal CYP51. SHR8008 has a lower affinity for heme-iron and a greater  
73 affinity for the fungal CYP51 polypeptide than current azole drugs. As a result, SHR8008  
74 more potently inhibits fungal CYP51 than current azoles and less potently inhibits host  
75 cytochrome P450 enzymes, resulting in greater CYP selectivity. Therefore, SHR8008  
76 avoids toxicity and drug interactions that occur with the cross-reaction of the azole with  
77 the human cytochrome P450 enzyme(16, 17). Moreover, SHR8008 has shown promising  
78 preclinical potential in the treatment of a wide range of fungal diseases, including  
79 dermatomycosis, trypanosomiasis, mycosis, coccidiomycosis and so on(18-22). Thus, the  
80 objective of this study was to evaluate the antifungal effect of SHR8008 systematically  
81 and to compare it with the triazoles itraconazole (ITC) and fluconazole (FLC) against  
82 common fluconazole-sensitive or resistant *Candida* and *Cryptococcus* strains isolated  
83 from Chinese patients in the last 2 years by Invasive Fungal Infection Group (IFIG).

84

## 85 **Results**

### 86 **All *Candida* species**

87 SHR8008 MICs ranged from 0.016-4 µg/mL against 127 *Candida* isolates, with MIC<sub>50</sub>  
88 and MIC<sub>90</sub> values of 0.031 and 1 µg/mL, respectively. As shown in Figure 1, SHR8008  
89 MICs using the 50% inhibition endpoint were towards the lower end of the concentration  
90 ranges tested for the majority of isolates. The SHR8008 MICs were also lower than those  
91 of FLC for all *Candida* isolates (Table 1) and this activity was maintained against  
92 FLC-resistant predominantly isolates. Based on GM MIC, SHR8008 (GM MIC=0.078  
93 µg/mL) was 6.5-fold and 11.2-fold more potent than ITC and FLC, respectively, and the  
94 differences between SHR8008 and FLC were statistically significant (Table 1 and  
95 Fig.1A). Good correlation between SHR8008 and ITC/FLC MICs (Pearson correlation  
96 coefficients of 0.7210 between SHR8008 and ITC, Pearson correlation coefficients of  
97 0.6859 between SHR8008 and FLC; Pearson  $P < 0.001$ ; Figure. 2A and B) was observed,  
98 suggesting that any *Candida* strains having high MICs of SHR8008 also show high MICs  
99 of both ITC and FLC. SHR8008 showed similar good activity against *C. guilliermondii*,  
100 *C. krusei* and *C. lusitaniae*. Then, The SHR8008 MICs were somewhat higher against  
101 those of ITC or FLC-resistant *Candida* isolates, with MICs ranging between 0.016 and 4  
102 µg/mL (Fig. 3). The MICs of SHR8008 were somewhat higher against the *C. glabrata*  
103 isolates (range, 0.125 to 4 µg/mL; MIC<sub>50</sub> and MIC<sub>90</sub>, 0.5 and 2 µg/mL, respectively). In  
104 contrast, the other isolates were inhibited by lower concentrations of SHR8008, as  
105 reflected by lower MIC ranges and MIC<sub>50</sub> and MIC<sub>90</sub> values. MIC values of SHR8008

106 against *C. glabrata* and *C. tropicalis* were significantly lower than those of FLC (Fig. 1B  
107 and Fig. 1C), while for *C. albicans* and *C. parapsilosis*, the differences between  
108 SHR8008 and FLC were not statistically significant, either (Fig. 1D and Fig. 1E).

109

#### 110 ***Candida glabrata* and *Candida tropicalis***

111 SHR8008 demonstrated *in vitro* activity against 32 *Candida glabrata* isolates and 30  
112 *Candida tropicalis* isolates tested in this study (Fig. 4A and Fig. 4B). All *C. glabrata* and  
113 *C. tropicalis* isolates were inhibited by SHR8008 at concentrations of  $\leq 4$   $\mu\text{g/mL}$  after 24  
114 h of incubation. The MIC<sub>50</sub> of SHR8008, ITC and FLC against *C. glabrata* isolates were  
115 0.5, 1, 2  $\mu\text{g/mL}$ , respectively. The MIC<sub>50</sub> against *C. tropicalis* isolates were 0.016, 0.5,  
116 0.25  $\mu\text{g/mL}$ , respectively. Based on GM MIC values read at 24 h, SHR8008 against *C.*  
117 *glabrata* was 2.3 fold and 7.3 fold more potent than ITC and FLC, respectively. And  
118 SHR8008 against *C. tropicalis* was 16.8 fold and 23.3 fold more potent than ITC and  
119 FLC, respectively. In *C. glabrata* and *C. tropicalis* isolates the MIC<sub>90</sub> values of SHR8008  
120 were 2, 1  $\mu\text{g/mL}$ , respectively.

121

#### 122 ***Candida albicans* and *Candida parapsilosis***

123 SHR8008 demonstrated *in vitro* activity against 32 *Candida albicans* isolates and 29  
124 *Candida parapsilosis* isolates tested in this study (Fig. 4C and Fig. 4D). All *C. albicans*  
125 and *C. parapsilosis* isolates were inhibited by SHR8008 at concentrations of  $\leq 2$   $\mu\text{g/mL}$   
126 after 24 h of incubation. The MIC<sub>50</sub> of SHR8008, ITC and FLC against *C. albicans*

127 isolates were 0.031, 0.25, 0.125  $\mu\text{g/mL}$ , respectively. And the  $\text{MIC}_{50}$  against *C.*  
128 *parapsilosis* isolates were 0.031, 0.125, 0.25  $\mu\text{g/mL}$ , respectively. The GM MICs of  
129 SHR8008 for *C. albicans* and *C. parapsilosis* were very low (0.037  $\mu\text{g/mL}$ ; 0.042  $\mu\text{g/mL}$ )  
130 and MIC values of SHR8008 were  $\leq 0.5$   $\mu\text{g/mL}$  for all *C. albicans* (Fig. 4C). For *C.*  
131 *albicans*, SHR8008 (GM MIC=0.037  $\mu\text{g/mL}$ ) was 8.6-fold and 10.9-fold more potent  
132 than ITC and FLC, respectively. For *C. parapsilosis*, SHR8008 (GM MIC=0.042  $\mu\text{g/mL}$ )  
133 was 5-fold and 8-fold more potent than ITC and FLC, respectively. In *C. albicans* and *C.*  
134 *parapsilosis* isolates the  $\text{MIC}_{90}$  values of SHR8008 were 0.125, 1  $\mu\text{g/mL}$ , respectively.

135

### 136 ***Cryptococcus* species**

137 Overall, SHR8008 demonstrated potent activity against *Cryptococcus neoformans* with  
138 MIC values ranging between 0.016-0.5  $\mu\text{g/mL}$  (Table 2). SHR8008 was more potent than  
139 ITC and FLC for each isolate, as evident by the lower MIC range and  $\text{MIC}_{50}$  and  $\text{MIC}_{90}$   
140 values (Fig. 5). With the 50% inhibition endpoint, the SHR8008  $\text{MIC}_{50}$ ,  $\text{MIC}_{90}$ , and GM  
141 MIC values were 0.016, 0.125, 0.024  $\mu\text{g/mL}$ , respectively. Based on GM MIC, SHR8008  
142 (GM MIC=0.024  $\mu\text{g/mL}$ ) was 21.7-fold and 104.5-fold more potent than ITC and FLC,  
143 respectively, and the differences between SHR8008 and FLC were statistically significant.  
144 The MIC distributions for SHR8008, ITC and FLC against the *C. neoformans* isolates are  
145 shown in Fig.5. Against the seven isolates with elevated FLC MICs ( $\geq 8\mu\text{g/mL}$  based on  
146 the  $\text{MIC}_{90}$  value for this azole), SHR8008 maintained potent activity, with MICs ranging  
147 between 0.031 and 0.5  $\mu\text{g/mL}$ . The SHR8008 MICs of tested isolates were directly



148 plotted with MICs of ITC and FLC to visualize the relationship, indicating a certain  
149 correlation between them (Pearson correlation coefficients of 0.5443 between SHR8008  
150 and ITC, Pearson correlation coefficients of 0.5139 between SHR8008 and FLC; Pearson  
151  $P \leq 0.001$ ; Figure. 6A and B).

152

### 153 **Discussion**

154 In this study, we systematically examined the *in vitro* susceptibility of yeast isolates  
155 obtained from IFIG to SHR8008, a novel tetrazole optimized for treatment, and SHR8008  
156 was found to be a potent inhibitor of common fluconazole-sensitive or resistant yeast  
157 isolates. This tetrazole is more specific to fungal CYP51 than mammalian P450, so the  
158 potential for clinically relevant drug interactions is reduced compared to triazole agents  
159 that have been approved for use in humans(23).

160 The management strategies of recurrent vulvovaginal candidiasis (RVVC) is needed  
161 urgently, and the indication for SHR8008 in phase three clinical development is RVVC  
162 (<https://www.mycovia.com>). It is a debilitating, chronic infectious condition that affects  
163 millions of women. Primary symptoms include vaginal itching, burning, irritation and  
164 inflammation. RVVC is a global women's health concern, which impacts the quality of  
165 life, to a degree comparable to asthma or COPD, and worse than diseases such as  
166 headache or migraine(24, 25). However, long-term maintenance suppressive fluconazole  
167 prophylaxis for RVVC frequently fails to cure the condition and serves only as an  
168 effective control measurement in many cases(26, 27). SHR8008 was shown to be

169 effective and safe in the treatment of patients with recurrent vulvovaginal candidiasis(28).  
170 In our study, SHR8008 had more potential *in vitro* activity against *Candida* spp. than  
171 itraconazole and fluconazole and it was also promising in the treatment of invasive fungal  
172 infection. SHR8008 was found to be a tight-binding ligand and a potent inhibitor of  
173 CYP51 from the fungal pathogen *Candida* spp.(17).

174 We found that the MIC<sub>50</sub> of SHR8008 against the *C. glabrata* isolates was 0.5  
175 µg/mL, which was higher than those against *C. albicans*, *C. parapsilosis* and *C. tropicalis*  
176 isolates (MIC<sub>50</sub> ≤ 0.031 µg/mL) (Table 1 and Fig. 4). Schell *et al.* described that the  
177 MIC<sub>50</sub> values of SHR8008 were 0.12 µg/mL and 0.25 µg/mL for resistant *C. glabrata* and  
178 *C. krusei*, respectively(29). A previous study has reported that the *in vitro* and *in vivo*  
179 activity of SHR8008 was maintained against fluconazole-resistant *C. albicans*  
180 isolates(30). In the current study, this activity was also maintained against other *Candida*  
181 isolates with resistance to azole (Fig. 3). However, Nishimoto *et al.* found that SHR8008  
182 may not be an ideal alternative in triazole-resistant *C. glabrata* infection, as it appears to  
183 be a substrate of the same efflux pumps associated with triazole resistance(31). Monk *et*  
184 *al.* found that azole resistance predicts reduced susceptibility to the tetrazole antifungal  
185 SHR8008, which is similar to this study(32). As shown in Fig. 2, a good correlation  
186 between MICs of ITC/FLC and SHR8008 was observed in a MIC distribution graph.  
187 MIC values of SHR8008 against *C. glabrata* and *C. tropicalis* were significantly lower  
188 than those of fluconazole (Table 1), so SHR8008 might make a breakthrough in the  
189 treatment of non-albicans infection.

190 *Cryptococcus* is a problematic opportunistic pathogen that causes invasive infection  
191 with high mortality. In particular, HIV-associated cryptococcal meningitis results in  
192 150,000–200,000 deaths per year in sub-Saharan Africa(33-35). A clinical study showed  
193 that 30% of patients with cryptococcal meningitis receiving recommended therapy died  
194 by day 70(36). SHR8008 also demonstrated activity against *Cryptococcus* spp., with  
195 elevated itraconazole and fluconazole MICs (Fig. 5). MIC range of SHR8008 against *C.*  
196 *neoformans* was considerably low (0.016-0.5 µg/ml). In this study, we found a good  
197 correlation between SHR8008, itraconazole and fluconazole susceptibility for *Candida*  
198 spp., while a lower correlation was seen in *Cryptococcus* spp. (Fig. 6). The activity of  
199 SHR8008 against *Cryptococcus neoformans* was comparable to that previously reported  
200 the novel tetrazole VT-1129 (GM MIC=0.0271 µg/ml), although there was no direct  
201 comparison between them(37). These data suggest that SHR8008 may be a promising  
202 agent against *Cryptococcus* species. Further studies, for instance, the additional in vivo  
203 studies, including pharmacokinetic/pharmacodynamic evaluations and experimental  
204 models using isolates with different resistance profiles, are needed to determine how this  
205 investigational tetrazole may be used in the treatment of *Cryptococcus* infections.

206 In a murine model of Vaginal Candidiasis, Garvey *et al.* have demonstrated the  
207 efficacy of the clinical agent SHR8008 against fluconazole-sensitive and -resistant  
208 albicans, whereas fluconazole did not sustain efficacy 4 days post treatment(38). Recently,  
209 the first case of successful use of orally administered SHR8008 to treat RVVC has been  
210 published. SHR8008 exhibited higher levels of oral bioavailability and plasma protein

211 binding than triazoles and showed excellent penetration into the vaginal and oral mucosa  
212 as determined in nonclinical models. In addition, there was also no evidence of an  
213 adverse effect of SHR8008 on liver function and SHR8008 further reduces the likelihood  
214 of problems arising from circulating drug substance(28). Thus, although the clinical  
215 breakpoints for the compound are not yet known, the MIC values reported here likely  
216 represent clinically relevant antifungal potencies.

217 SHR8008 is now under clinical development. The *in vitro* data of SHR8008 in our  
218 study indicates its potential to become a new generation of drug candidate for *Candida*  
219 and *Cryptococcus* infection prevention and treatment.

220

## 221 **Materials and methods**

### 222 **Antifungal agents**

223 SHR8008 (VT-1161, powders >99% pure) was synthesized by Mycovia Pharmaceuticals,  
224 Inc (DURHAM, NC, USA), whereas itraconazole (99% pure; Shanghai Aladdin  
225 Bio-Chem Technology Co., LTD, Shanghai, China), fluconazole (99% pure; National  
226 Institutes for Food and Drug Control, Beijing, China) were procured from commercial  
227 sources. Three drugs are supplied by Jiangsu Hengrui Medicine Co., Ltd. (Lianyungang,  
228 China).

229

### 230 **Strains**

231 A collection of 177 clinical yeast strains isolated from IFIG, Shanghai East Hospital,

232 were used in the study, including 32 *Candida albicans*, 32 *Candida glabrata*, 29 *Candida*  
233 *parapsilosis*, 30 *Candida tropicalis*, two *Candida guilliermondii*, one *Candida krusei*,  
234 one *Candida lusitaniae* and 50 *Cryptococcus neoformans*. *Candida parapsilosis* (ATCC  
235 22019) and *Candida krusei* (ATCC 6258) were also used as quality control (QC) strains.  
236 They were inoculated onto CHROMagar *Candida* or Sabouraud dextrose agar culture  
237 medium following the National Clinical Laboratory Procedures (4th Edition). According  
238 to the color of the growing colony, the VITEK-2 Compact YST card (bioMérieux) or  
239 MALDI-TOF MS (bioMérieux or Bruker) was performed for preliminary identification.  
240 All the strains were identified by MALDI-TOF MS (Autobio) in the Central Laboratories  
241 (Shanghai East Hospital) again, and the strains with inconsistent results were identified  
242 by rDNA sequence analysis of the internal transcribed spacer (ITS) region (ITS1 primer:  
243 TCCGTAGGTGAACCTGCGG; ITS4 primer: TCCTCCGCTTATTGATATG).

244

#### 245 **Antifungals and susceptibility testing**

246 Antifungal susceptibility testing of yeasts was performed by broth microdilution in  
247 accordance with the Clinical and Laboratory Standards Institute (CLSI) M27-E4  
248 reference standard(39). As stated in the protocol, Roswell Park Memorial Institute (RPMI)  
249 1640 culture medium, with glutamine, without bicarbonate, and with phenol red as a pH  
250 indicator (Thermofisher), with 0.165 mol/L 3-(N-morpholino) propanesulfonic acid  
251 (MOPS; Sangong) was used to incubate strains across serially diluted concentrations of  
252 each azole. The  $0.25\text{--}0.5 \times 10^3$  cells/mL inoculum suspensions of yeasts were obtained

253 from 24 h (*Candida* spp.) or 48h (*Cryptococcus* spp.) cultured Sabouraud dextrose agar  
254 plates at 35°C. Inoculum concentrations were verified by quantitative culture. Three  
255 antifungal agents were dissolved in dimethylsulfoxide (DMSO). The drugs were prepared  
256 at the following concentrations: 320 µg/mL for SHR8008 and ITC and 1280 µg/mL for  
257 FLC. The solutions were diluted in RPMI medium and the final drug concentrations  
258 ranging from 16 to 0.016 µg/mL, except for fluconazole, which ranged from 128 to 0.125  
259 µg/mL. The results were read separately at 24 h (*Candida* spp.) and 72 h (*Cryptococcus*  
260 spp.) after incubation. MIC endpoints were determined visually as the lowest  
261 concentration of compound that resulted in a decrease of growth by 50% relative to that  
262 of the growth control (azole endpoint: SHR8008, itraconazole, and fluconazole). MICs  
263 were determined in duplicate for clinical isolates. Categorical results were interpreted  
264 following the CLSI M60 document(40).

265

## 266 **Data analysis**

267 Statistical analyses of all the data were performed using GraphPad PRISM 8 software  
268 program and the results are reported as MIC range, geometric mean MIC (GM MIC),  
269 MIC<sub>50</sub> and MIC<sub>90</sub>. The MIC<sub>50</sub> and MIC<sub>90</sub> values reported for SHR8008, itraconazole and  
270 fluconazole, were defined as the minimum drug concentrations required to inhibit 50%  
271 and 90% of the clinical yeast isolates tested, respectively. Differences in MICs, calculated  
272 following log<sub>2</sub> transformation of individual MIC values, were assessed for significance by  
273 ANOVA followed by Tukey's multiple comparison test. A *P* value of <0.05 was

274 considered statistically significant. The correlation between SHR8008 MICs and those of  
275 the other antifungals was also assessed by Pearson correlation using log<sub>2</sub>-transformed  
276 MIC values.

277

## 278 **Acknowledgements**

279 We would like to thank Jiangsu Hengrui Medicine Co., Ltd. (Lianyungang, China) for  
280 providing SHR8008 (VT-1161), itraconazole and fluconazole drugs.

281 This study was funded by National Natural Science Foundation (grant number 81971990),  
282 Key Discipline Construction Project of Pudong Health Bureau of Shanghai (grant number  
283 PWZxk201709), Municipal Human Resources Development Program for Outstanding  
284 Leaders in Medical Disciplines in Shanghai (grant number 2017BR032).

285 **References**

- 286 1. Sifuentes-Osornio J, Corzo-Leon DE, Ponce-de-Leon LA. 2012. Epidemiology of  
287 Invasive Fungal Infections in Latin America. *Curr Fungal Infect Rep* 6:23-34.
- 288 2. Slavin MA, Chakrabarti A. 2012. Opportunistic fungal infections in the  
289 Asia-Pacific region. *Medical Mycology* 50:18-25.
- 290 3. Srivastava V, Singla RK, Dubey AK. 2018. Emerging Virulence, Drug Resistance  
291 and Future Anti-fungal Drugs for Candida Pathogens. *Curr Top Med Chem*  
292 18:759-778.
- 293 4. Yapar N. 2014. Epidemiology and risk factors for invasive candidiasis. *Ther Clin*  
294 *Risk Manag* 10:95-105.
- 295 5. Anonymous. 2017. Stop neglecting fungi. *Nat Microbiol* 2:17120.
- 296 6. Xiao M, Sun ZY, Kang M, Guo DW, Liao K, Chen SC, Kong F, Fan X, Cheng JW,  
297 Hou X, Zhou ML, Li Y, Yu SY, Huang JJ, Wang H, Xu YC, China Hospital  
298 Invasive Fungal Surveillance Net Study G. 2018. Five-Year National Surveillance  
299 of Invasive Candidiasis: Species Distribution and Azole Susceptibility from the  
300 China Hospital Invasive Fungal Surveillance Net (CHIF-NET) Study. *J Clin*  
301 *Microbiol* 56.
- 302 7. Brown GD, Denning DW, Levitz SM. 2012. Tackling human fungal infections.  
303 *Science* 336:647.
- 304 8. Wiederhold NP. 2018. The antifungal arsenal: alternative drugs and future targets.  
305 *Int J Antimicrob Agents* 51:333-339.



- 306 9. Perfect JR, Dismukes WE, Dromer F, Goldman DL, Graybill JR, Hamill RJ,  
307 Harrison TS, Larsen RA, Lortholary O, Nguyen MH, Pappas PG, Powderly WG,  
308 Singh N, Sobel JD, Sorrell TC. 2010. Clinical Practice Guidelines for the  
309 Management of Cryptococcal Disease: 2010 Update by the Infectious Diseases  
310 Society of America. *Clinical Infectious Diseases* 50:291-322.
- 311 10. Loyse A, Thangaraj H, Easterbrook P, Ford N, Roy M, Chiller T, Govender N,  
312 Harrison TS, Bicanic T. 2013. Cryptococcal meningitis: improving access to  
313 essential antifungal medicines in resource-poor countries. *The Lancet Infectious  
314 Diseases* 13:629-637.
- 315 11. Bongomin F, Oladele RO, Gago S, Moore CB, Richardson MD. 2018. A  
316 systematic review of fluconazole resistance in clinical isolates  
317 of *Cryptococcus* species. *Mycoses* 61:290-297.
- 318 12. Molloy SF, Kanyama C, Heyderman RS, Loyse A, Kouanfack C, Chanda D,  
319 Mfinanga S, Temfack E, Lakhi S, Lesikari S, Chan AK, Stone N, Kalata N,  
320 Karunaharan N, Gaskell K, Peirse M, Ellis J, Chawinga C, Lontsi S, Ndong J-G,  
321 Bright P, Lupiya D, Chen T, Bradley J, Adams J, van der Horst C, van Oosterhout  
322 JJ, Sini V, Mapoure YN, Mwaba P, Bicanic T, Lalloo DG, Wang D, Hosseinipour  
323 MC, Lortholary O, Jaffar S, Harrison TS. 2018. Antifungal Combinations for  
324 Treatment of Cryptococcal Meningitis in Africa. *New England Journal of  
325 Medicine* 378:1004-1017.
- 326 13. Kullberg BJ, Arendrup MC. 2015. Invasive Candidiasis. *N Engl J Med*

- 327 373:1445-56.
- 328 14. Miceli MH, Díaz JA, Lee SA. 2011. Emerging opportunistic yeast infections. The  
329 Lancet Infectious Diseases 11:142-151.
- 330 15. Arendrup MC, Patterson TF. 2017. Multidrug-Resistant Candida: Epidemiology,  
331 Molecular Mechanisms, and Treatment. J Infect Dis 216:S445-S451.
- 332 16. Hargrove TY, Friggeri L, Wawrzak Z, Qi A, Hoekstra WJ, Schotzinger RJ, York  
333 JD, Guengerich FP, Lepesheva GI. 2017. Structural analyses of *Candida albicans*  
334 sterol 14 $\alpha$ -demethylase complexed with azole drugs address the molecular  
335 basis of azole-mediated inhibition of fungal sterol biosynthesis. J Biol Chem  
336 292:6728-6743.
- 337 17. Warrilow AG, Hull CM, Parker JE, Garvey EP, Hoekstra WJ, Moore WR,  
338 Schotzinger RJ, Kelly DE, Kelly SL. 2014. The clinical candidate VT-1161 is a  
339 highly potent inhibitor of *Candida albicans* CYP51 but fails to bind the human  
340 enzyme. Antimicrob Agents Chemother 58:7121-7.
- 341 18. Garvey EP, Hoekstra WJ, Moore WR, Schotzinger RJ, Long L, Ghannoum MA.  
342 2015. VT-1161 dosed once daily or once weekly exhibits potent efficacy in  
343 treatment of dermatophytosis in a guinea pig model. Antimicrob Agents  
344 Chemother 59:1992-7.
- 345 19. Hoekstra WJ, Hargrove TY, Wawrzak Z, da Gama Jaen Batista D, da Silva CF,  
346 Nefertiti AS, Rachakonda G, Schotzinger RJ, Villalta F, Soeiro Mde N, Lepesheva  
347 GI. 2016. Clinical Candidate VT-1161's Antiparasitic Effect In Vitro, Activity in a

- 348 Murine Model of Chagas Disease, and Structural Characterization in Complex  
349 with the Target Enzyme CYP51 from *Trypanosoma cruzi*. *Antimicrob Agents*  
350 *Chemother* 60:1058-66.
- 351 20. Shubitz LF, Trinh HT, Galgiani JN, Lewis ML, Fothergill AW, Wiederhold NP,  
352 Barker BM, Lewis ER, Doyle AL, Hoekstra WJ, Schotzinger RJ, Garvey EP. 2015.  
353 Evaluation of VT-1161 for Treatment of Coccidioidomycosis in Murine Infection  
354 Models. *Antimicrob Agents Chemother* 59:7249-54.
- 355 21. Gebremariam T, Alkhazraji S, Lin L, Wiederhold NP, Garvey EP, Hoekstra WJ,  
356 Schotzinger RJ, Patterson TF, Filler SG, Ibrahim AS. 2017. Prophylactic  
357 Treatment with VT-1161 Protects Immunosuppressed Mice from *Rhizopus*  
358 *arrhizus* var. *arrhizus* Infection. *Antimicrob Agents Chemother* 61.
- 359 22. Warrilow AGS, Parker JE, Price CL, Garvey EP, Hoekstra WJ, Schotzinger RJ,  
360 Wiederhold NP, Nes WD, Kelly DE, Kelly SL. 2017. The Tetrazole VT-1161 Is a  
361 Potent Inhibitor of *Trichophyton rubrum* through Its Inhibition of *T. rubrum*  
362 CYP51. *Antimicrob Agents Chemother* 61.
- 363 23. Yates CM, Garvey EP, Shaver SR, Schotzinger RJ, Hoekstra WJ. 2017. Design  
364 and optimization of highly-selective, broad spectrum fungal CYP51 inhibitors.  
365 *Bioorg Med Chem Lett* 27:3243-3248.
- 366 24. Aballea S, Guelfucci F, Wagner J, Khemiri A, Dietz JP, Sobel J, Toumi M. 2013.  
367 Subjective health status and health-related quality of life among women with  
368 Recurrent Vulvovaginal Candidosis (RVVC) in Europe and the USA. *Health and*

- 369           Quality of Life Outcomes 11.
- 370   25.   Blostein F, Levin-Sparenberg E, Wagner J, Foxman B. 2017. Recurrent  
371       vulvovaginal candidiasis. *Ann Epidemiol* 27:575-582 e3.
- 372   26.   Sobel JD. 2006. Management of recurrent vulvovaginal candidiasis: unresolved  
373       issues. *Curr Infect Dis Rep* 8:481-6.
- 374   27.   Sobel JD. 2016. Recurrent vulvovaginal candidiasis. *Am J Obstet Gynecol*  
375       214:15-21.
- 376   28.   Brand SR, Degenhardt TP, Person K, Sobel JD, Nyirjesy P, Schotzinger RJ,  
377       Tavakkol A. 2018. A phase 2, randomized, double-blind, placebo-controlled,  
378       dose-ranging study to evaluate the efficacy and safety of orally administered  
379       VT-1161 in the treatment of recurrent vulvovaginal candidiasis. *Am J Obstet*  
380       *Gynecol* 218:624 e1-624 e9.
- 381   29.   Schell WA, Jones AM, Garvey EP, Hoekstra WJ, Schotzinger RJ, Alexander BD.  
382       2017. Fungal CYP51 Inhibitors VT-1161 and VT-1129 Exhibit Strong In Vitro  
383       Activity against *Candida glabrata* and *C. krusei* Isolates Clinically Resistant to  
384       Azole and Echinocandin Antifungal Compounds. *Antimicrob Agents Chemother*  
385       61.
- 386   30.   Break TJ, Desai JV, Natarajan M, Ferre EMN, Henderson C, Zelazny AM,  
387       Siebenlist U, Hoekstra WJ, Schotzinger RJ, Garvey EP, Lionakis MS. 2018.  
388       VT-1161 protects mice against oropharyngeal candidiasis caused by  
389       fluconazole-susceptible and -resistant *Candida albicans*. *J Antimicrob Chemother*

- 390 73:151-155.
- 391 31. Nishimoto AT, Whaley SG, Wiederhold NP, Zhang Q, Yates CM, Hoekstra WJ,  
392 Schotzinger RJ, Garvey EP, Rogers PD. 2019. Impact of the Major *Candida*  
393 *glabrata* Triazole Resistance Determinants on the Activity of the Novel  
394 Investigational Tetrazoles VT-1598 and VT-1161. *Antimicrob Agents Chemother*  
395 63.
- 396 32. Monk BC, Keniya MV, Sabherwal M, Wilson RK, Graham DO, Hassan HF, Chen  
397 D, Tyndall JDA. 2019. Azole Resistance Reduces Susceptibility to the Tetrazole  
398 Antifungal VT-1161. *Antimicrob Agents Chemother* 63.
- 399 33. Limper AH, Adenis A, Le T, Harrison TS. 2017. Fungal infections in HIV/AIDS.  
400 *Lancet Infect Dis* 17:e334-e343.
- 401 34. Maziarz EK, Perfect JR. 2016. Cryptococcosis. *Infectious Disease Clinics of*  
402 *North America* 30:179-206.
- 403 35. May RC, Stone NRH, Wiesner DL, Bicanic T, Nielsen K. 2015. *Cryptococcus*:  
404 from environmental saprophyte to global pathogen. *Nature Reviews Microbiology*  
405 14:106-117.
- 406 36. Day JN, Chau TTH, Wolbers M, Mai PP, Dung NT, Mai NH, Phu NH, Nghia HD,  
407 Phong ND, Thai CQ, Thai LH, Chuong LV, Sinh DX, Duong VA, Hoang TN,  
408 Diep PT, Campbell JI, Sieu TPM, Baker SG, Chau NVV, Hien TT, Lalloo DG,  
409 Farrar JJ. 2013. Combination Antifungal Therapy for Cryptococcal Meningitis.  
410 *New England Journal of Medicine* 368:1291-1302.

- 411 37. Lockhart SR, Fothergill AW, Iqbal N, Bolden CB, Grossman NT, Garvey EP,  
412 Brand SR, Hoekstra WJ, Schotzinger RJ, Ottinger E, Patterson TF, Wiederhold NP.  
413 2016. The Investigational Fungal Cyp51 Inhibitor VT-1129 Demonstrates Potent  
414 In Vitro Activity against *Cryptococcus neoformans* and *Cryptococcus gattii*.  
415 *Antimicrob Agents Chemother* 60:2528-31.
- 416 38. Garvey EP, Hoekstra WJ, Schotzinger RJ, Sobel JD, Lilly EA, Fidel PL, Jr. 2015.  
417 Efficacy of the clinical agent VT-1161 against fluconazole-sensitive and -resistant  
418 *Candida albicans* in a murine model of vaginal candidiasis. *Antimicrob Agents*  
419 *Chemother* 59:5567-73.
- 420 39. CLSI. 2017. Reference Method for Broth Dilution Antifungal Susceptibility  
421 Testing of Yeasts, 4th ed. CLSI standard M27. Clinical and Laboratory Standards  
422 Institute, Wayne, PA.
- 423 40. CLSI. 2017. Performance Standards for Antifungal Susceptibility Testing of  
424 Yeasts. 1st ed. CLSI supplement M60. Clinical and Laboratory Standards Institute,  
425 Wayne, PA.
- 426

427 **Figure Legends**

428 **Fig. 1. MICs of SHR8008, itraconazole and fluconazole for all *Candida* isolates**  
429 **tested.** MICs of SHR8008, itraconazole and fluconazole determined by the CLSI method  
430 for all tested *Candida* isolates are plotted. (A) All *Candida* isolates. (B) *C. glabrata*  
431 isolates. (C) *C. tropicalis* isolates. (D) *C. albicans* isolates. (E) *C. parapslosis* isolates.  $P <$   
432 0.001, significant. NS, not significant; ITC, itraconazole; FLC, fluconazole.

433

434 **Fig. 2. Individual MIC distribution and correlation.** Relationship of MIC distribution  
435 for all *Candida* isolates between SHR8008 and itraconazole (A), fluconazole (B) is  
436 shown. ITC, itraconazole; FLC, fluconazole. R, Pearson correlation coefficient ( $|r| = 1.0$ ,  
437 completely correlated;  $|r| = 0.8 \sim 1.0$ , highly correlated;  $|r| = 0.5 \sim 0.8$ , significantly  
438 correlated.  $|r| = 0.3 \sim 0.5$ , low correlation;  $|r| < 0.3$ , weak correlation;  $R = 0$ , no correlation);  
439  $P < 0.0001$ , the two are significantly (strongly) correlated.

440

441 **Fig. 3. Distribution of SHR8008 MICs against all fluconazole-resistant *Candida***  
442 **isolates (n=19).**

443

444 **Fig. 4. Distribution of SHR8008, itraconazole and fluconazole MICs against *Candida***  
445 **isolates.** (A) *C. glabrata* isolates. (B) *C. tropicalis* isolates. (C) *C. albicans* isolates. (D)  
446 *C. parapslosis* isolates.

447

448 **Fig. 5. MICs of SHR8008, itraconazole and fluconazole for all *Cryptococcus***  
449 ***neoformans* isolates tested.** MICs of SHR8008, itraconazole and fluconazole determined  
450 by the CLSI method for all tested *Cryptococcus neoformans* isolates (n=50) are plotted.  
451  $P < 0.001$ , significant. NS, not significant; ITC, itraconazole; FLC, fluconazole.

452

453 **Fig. 6. Individual MIC distribution and correlation.** Relationship of MIC distribution  
454 for all tested *Cryptococcus neoformans* isolates between SHR8008 and itraconazole (A),  
455 fluconazole (B) is shown. ITC, itraconazole; FLC, fluconazole.



456 **Figure 1.**

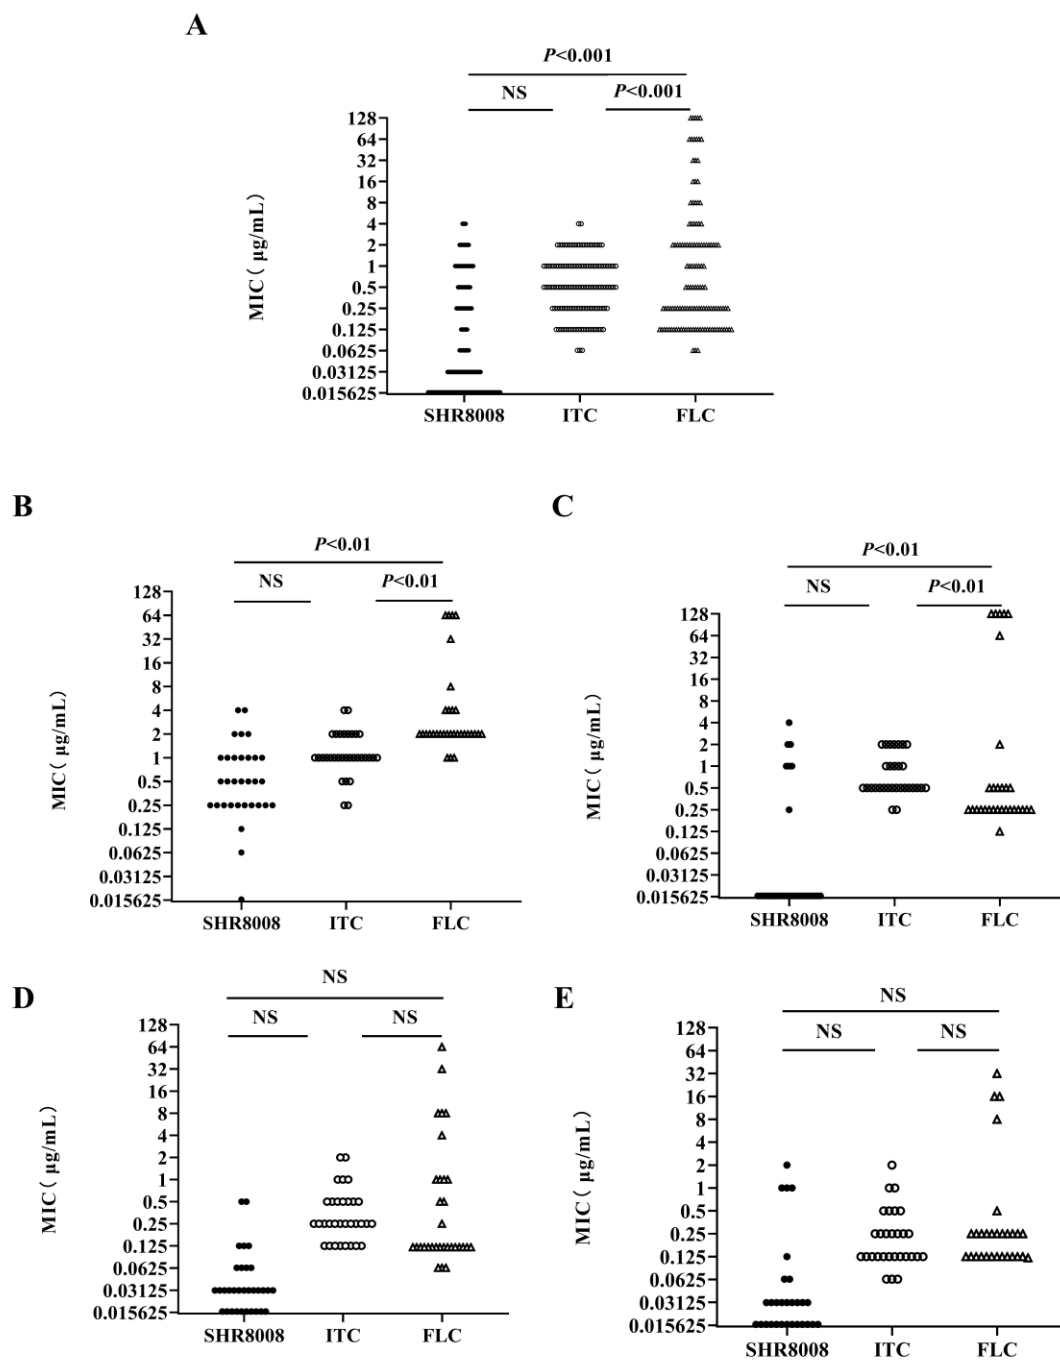

457

458 **Figure 2.**

**A**

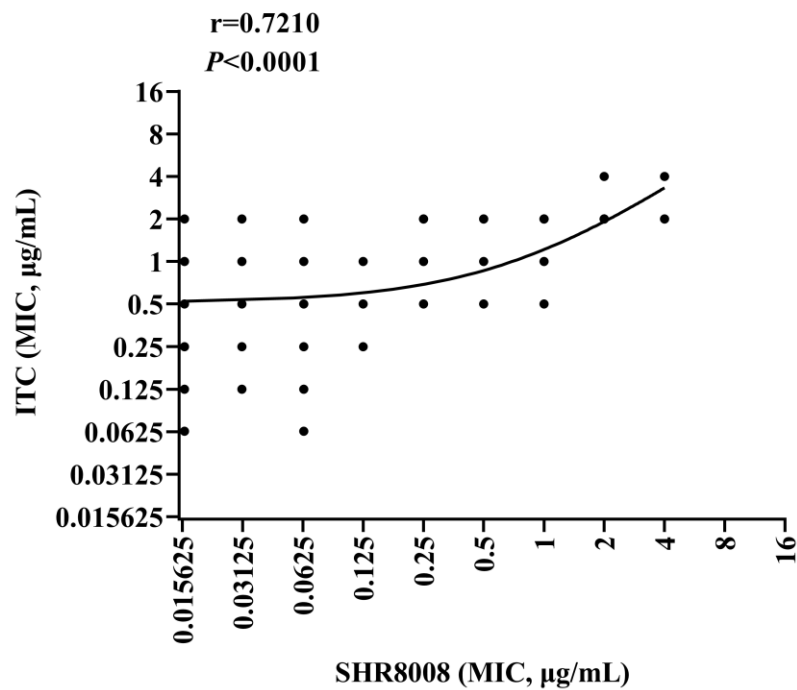

**B**

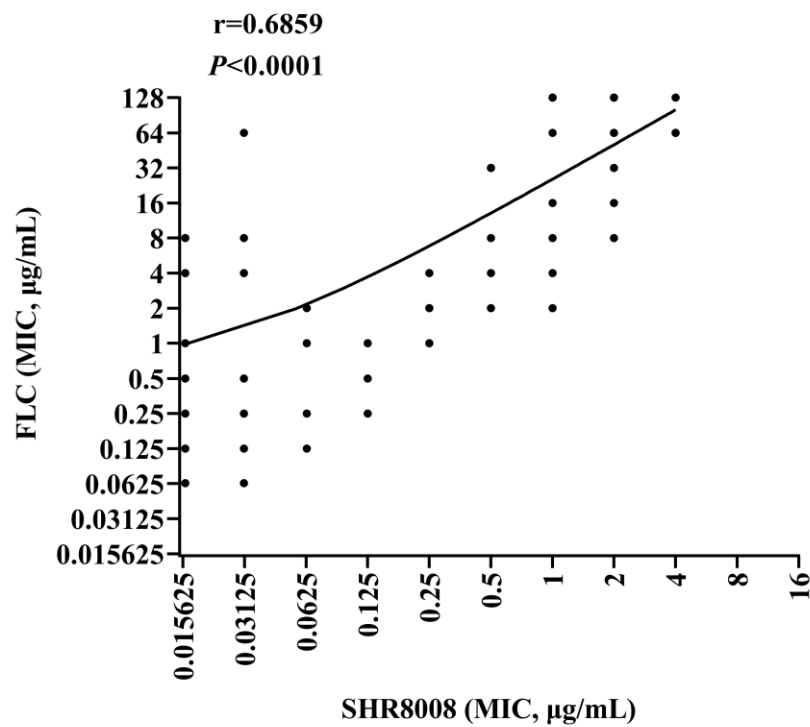

459

460 **Figure 3.**

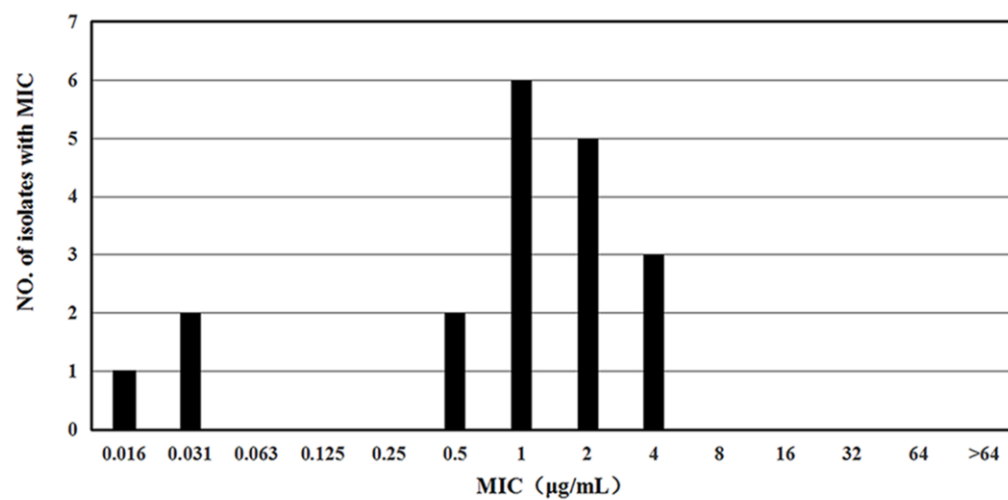

461

462 **Figure 4.**

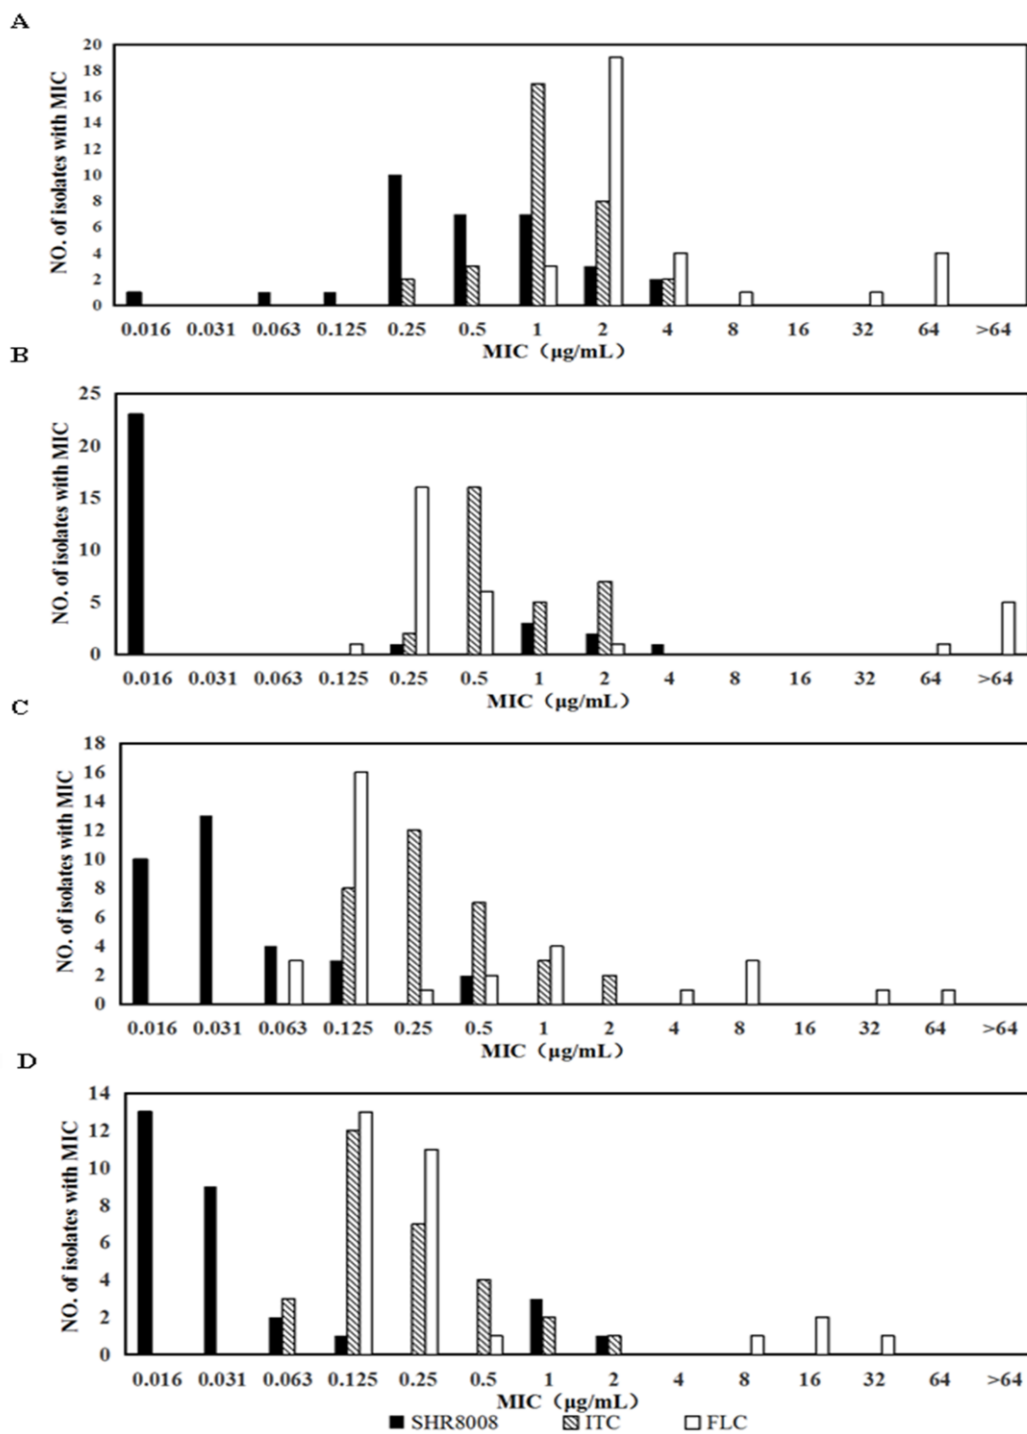

463

464 **Figure 5.**

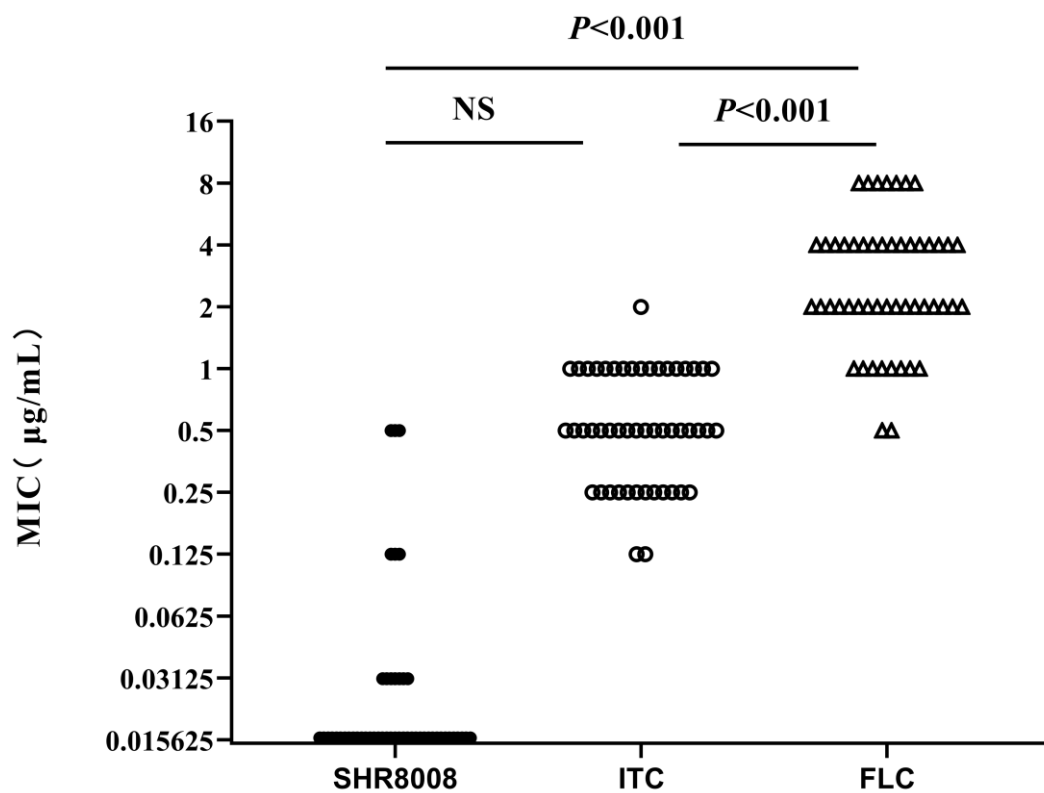

465

466 **Figure 6.**

**A**

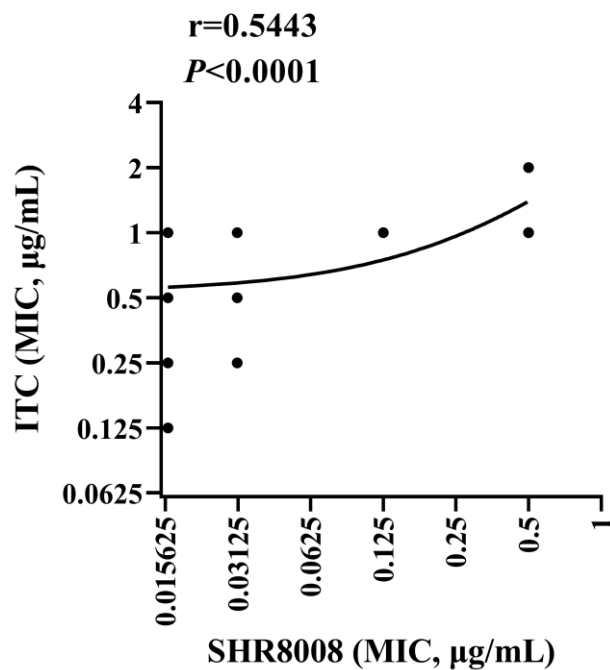

**B**

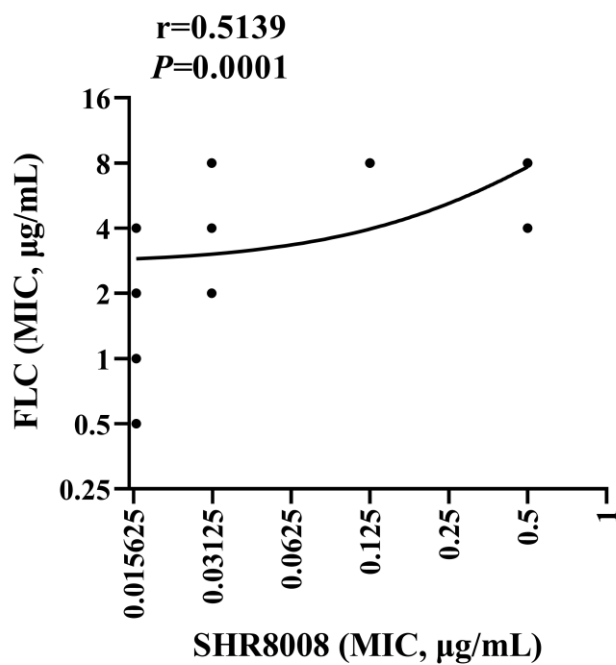

467

468 Table 1. SHR8008, itraconazole and fluconazole MICs against all *Candida* isolates  
 469 (n=127)

| Species                            | Drug <sup>a</sup> | MIC Range<br>(µg/mL) | GM MIC <sup>b</sup><br>(µg/mL) | MIC <sub>50</sub> <sup>b</sup><br>(µg/mL) | MIC <sub>90</sub> <sup>b</sup><br>(µg/mL) |
|------------------------------------|-------------------|----------------------|--------------------------------|-------------------------------------------|-------------------------------------------|
| Total (n=127 <sup>c</sup> )        | SHR8008           | 0.016-4              | 0.078                          | 0.031                                     | 1                                         |
|                                    | ITC               | 0.063-4              | 0.506                          | 0.5                                       | 2                                         |
|                                    | FLC               | 0.063->128           | 0.873                          | 0.5                                       | 32                                        |
| <i>Candida glabrata</i> (n=32)     | SHR8008           | 0.125-4              | 0.49                           | 0.5                                       | 2                                         |
|                                    | ITC               | 0.25-4               | 1.114                          | 1                                         | 2                                         |
|                                    | FLC <sup>df</sup> | 1-64                 | 3.589                          | 2                                         | 64                                        |
| <i>Candida tropicalis</i> (n=30)   | SHR8008           | 0.016-4              | 0.044                          | 0.016                                     | 1                                         |
|                                    | ITC               | 0.25-2               | 0.741                          | 0.5                                       | 2                                         |
|                                    | FLC <sup>ef</sup> | 0.125->128           | 1.023                          | 0.25                                      | >64.0                                     |
| <i>Candida albicans</i> (n=32)     | SHR8008           | 0.016-0.5            | 0.037                          | 0.031                                     | 0.125                                     |
|                                    | ITC               | 0.125-2              | 0.317                          | 0.25                                      | 1                                         |
|                                    | FLC <sup>e</sup>  | 0.063-64             | 0.403                          | 0.125                                     | 8                                         |
| <i>Candida parapsilosis</i> (n=29) | SHR8008           | 0.016-2              | 0.042                          | 0.031                                     | 1                                         |
|                                    | ITC               | 0.063-2              | 0.212                          | 0.125                                     | 1                                         |
|                                    | FLC <sup>e</sup>  | 0.125-32             | 0.333                          | 0.25                                      | 16                                        |

470 <sup>a</sup> ITC, itraconazole; FLC, fluconazole

471 <sup>b</sup> GM, geometric mean MIC; MIC<sub>50</sub>, MICs at which 50% of the isolates are inhibited;  
 472 MIC<sub>90</sub>, MICs at which 90% of the isolates are inhibited.

473 <sup>c</sup> In addition to those specifically listed, there are two *Candida guilliermondii*, one  
 474 *Candida krusei* and one *Candida lusitanae* in 127 *Candida* isolates.

475 <sup>d</sup> CLSI clinical breakpoints: resistant  $\geq$  64 (µg/mL); susceptible dose-dependent  $\leq$  32  
 476 (µg/mL);

477 <sup>e</sup> CLSI clinical breakpoints: resistant  $\geq$  8 (µg/mL); susceptible dose-dependent = 4  
 478 (µg/mL); susceptible  $\leq$  2 (µg/mL).

479 <sup>f</sup>  $P < 0.01$  versus SHR8008.

480 Table 2. SHR8008, itraconazole and fluconazole MICs against *Cryptococcus neoformans*  
 481 isolates (n=50)

| Compound<br>s <sup>a</sup> | MIC range<br>(µg/mL) | GM <sup>b</sup><br>(µg/mL) | MIC <sub>50</sub> <sup>b</sup><br>(µg/mL) | MIC <sub>90</sub> <sup>b</sup><br>(µg/mL) | MIC distribution and range (µg/mL) |           |           |           |      |     |    |    |    |   |    |  |  |
|----------------------------|----------------------|----------------------------|-------------------------------------------|-------------------------------------------|------------------------------------|-----------|-----------|-----------|------|-----|----|----|----|---|----|--|--|
|                            |                      |                            |                                           |                                           | 0.01<br>6                          | 0.03<br>1 | 0.06<br>3 | 0.12<br>5 | 0.25 | 0.5 | 1  | 2  | 4  | 8 | 16 |  |  |
| SHR8008                    | 0.016-0.5            | 0.024                      | 0.016                                     | 0.125                                     | 37                                 | 7         |           | 3         | 3    |     |    |    |    |   |    |  |  |
| ITR                        | 0.125-2              | 0.521                      | 0.5                                       | 1                                         |                                    |           |           | 2         | 12   | 18  | 17 | 1  |    |   |    |  |  |
| FLC                        | 0.5-8.0              | 2.567                      | 2                                         | 8                                         |                                    |           |           |           |      | 2   | 8  | 17 | 16 | 7 |    |  |  |

482 <sup>a</sup> ITC, itraconazole; FLC, fluconazole

483 <sup>b</sup> GM, geometric mean MIC; MIC<sub>50</sub>, MICs at which 50% of the isolates are inhibited;

484 MIC<sub>90</sub>, MICs at which 90% of the isolates are inhibited.
